# Supplementary material for: N-acetylcysteine alleviates PCB52-induced hepatotoxicity by repressing oxidative stress and inflammatory responses
Source: PeerJ. 2020 Aug 11;8:e9720. doi: 10.7717/peerj.9720 (PMC7427542; doi:10.7717/peerj.9720)
Supplement: Supplemental Information 4 [file peerj-08-9720-s004.xlsx]

## Sheet: BRL3A-PCB52
BRL3A
	0	10	20	40	80		0	10	20	40	80
	2.20867	1.91267	1.67367	1.10367	0.120667		102.111	88.4266	77.3771	51.0248	5.57867
	2.15067	1.84767	1.57967	1.08667	0.360667		99.4298	85.4215	73.0313	50.2389	16.6744
	2.12967	1.89367	1.63467	1.22767	0.235667		98.4589	87.5482	75.574	56.7576	10.8954
average	2.163	1.88467	1.62933	1.13933	0.239		100	87.1321	75.3275	52.6738	11.0495

## Sheet: BRL3A-NAC-PCB52
Brl-3a
	control	PCB52	NAC+PCB52	NAC		control	PCB52	NAC+PCB52	NAC		%	control	PCB52	NAC+PCB52	NAC
	102.152	75.448	95.5684	98.4691		1.02152	0.75448	0.955684	0.984691			102.152	75.448	95.5684	98.4691
	99.8043	87.1427	92.6217	97.6403		0.998043	0.871427	0.926217	0.976403			99.8043	87.1427	92.6217	97.6403
	97.3641	73.0077	88.2017	98.8835		0.973641	0.730077	0.882017	0.988835			97.3641	73.0077	88.2017	98.8835
	100.679	77.6119	90.3657	98.6993		1.00679	0.776119	0.903657	0.986993			100.679	77.6119	90.3657	98.6993
average	100	78.3026	91.6894	98.4231		1	0.783026	0.916894	0.984231			100	78.3026	91.6894	98.4231
											p		0.00054857
											p			0.00840267

## Sheet: L02-PCB52
L02
	0	10	20	40	80	%	0	10	20	40	80
	1.85733	1.61033	1.50233	1.38433	0.770333		94.1693	81.6461	76.1704	70.1876	39.057
	2.11733	1.68333	1.75133	1.42433	0.825333		107.352	85.3473	88.795	72.2156	41.8455
	1.94233	1.74033	1.74033	1.40433	1.07833		98.479	88.2373	88.2373	71.2016	54.673
average	1.97233	1.678	1.66467	1.40433	0.891333		100	85.0769	84.4009	71.2016	45.1918

## Sheet: L02-NAC-PCB52
L-02
	control	PCB52	NAC+PCB52	NAC		control	PCB52	NAC+PCB52	NAC		%	control	PCB52	NAC+PCB52	NAC
	102.185	74.0416	82.78	95.5022		1.02185	0.740416	0.8278	0.955022			102.185	74.0416	82.78	95.5022
	96.7873	75.9049	84.5149	96.0805		0.967873	0.759049	0.845149	0.960805			96.7873	75.9049	84.5149	96.0805
	101.028	80.2741	83.4226	101.735		1.01028	0.802741	0.834226	1.01735			101.028	80.2741	83.4226	101.735
average	100	76.7402	83.5725	97.7725		1	0.767402	0.835725	0.977725		p		0.00070939
											p			0.000666806
