# Supplementary material for: N-acetylcysteine alleviates PCB52-induced hepatotoxicity by repressing oxidative stress and inflammatory responses
Source: PeerJ. 2020 Aug 11;8:e9720. doi: 10.7717/peerj.9720 (PMC7427542; doi:10.7717/peerj.9720)
Supplement: Supplemental Information 5 [file peerj-08-9720-s005.xlsx]

## Sheet: BRL3A
		Population	Events	%Parent	DCFH-DA（Mean）
	C1	P1	8830	88.3	565
		P2	669	7.6	1590
	C2	P1	8866	88.7	532
		P2	545	6.1	1777
	C3	P1	9019	90.2	539
		P2	588	6.5	1515
	PCB1	P1	8878	88.8	325
		P2	82	0.9	3126
	PCB2	P1	8937	89.4	314
		P2	101	1.1	2841
	PCB3	P1	9047	90.5	309
		P2	72	0.8	2168

## Sheet: BRL3A-NAC
		control	NAC	PCB	NAC+PCB
	1	1983	1867	2383	2037
	2	1778	1964	2385	2057
	3	1880.5	1719	2281	2015
	average	1880.5	1850	2349.67	2036.33
	p		0.758421	0.00236789
	p				0.00100282

## Sheet: L02
		Population	Events	%Parent	DCFH-DA（Mean）
	C1	P1	9529	95.3	930
		P2	2020	21.2	2649
	C2	P1	9520	95.2	849
		P2	1704	17.9	2551
	C3	P1	9561	95.6	1012
		P2	2256	23.6	2473
	PCB1	P1	9226	92.7	952
		P2	1713	18.5	2811
	PCB2	P1	9204	92	1336
		P2	2918	31.7	2927
	PCB3	P1	9352	93.5	1459
		P2	3507	37.5	2877

## Sheet: L02-NAC
	Population	Events	%Parent	DCFH-DA（Mean）			Population	Events	%Parent	DCFH-DA（Mean）
C1	P1	9628	96.3	171		NAC1	P1	19426	97.1	168
	P2	12	0.1	2533			P2	60	0.7	1862
C2	P1	9645	96.4	166		NAC2	P1	9719	97.2	148
	P2	18	0.2	1868			P2	8	0.1	1686
C3	P1	9722	97.2	169		NAC3	P1	9542	95.4	148
	P2	22	0.2	2292			P2	5	0.1	1430
PCB1	P1	9719	97.2	152		NAC+PCB1	P1	9356	93.6	189
	P2	9	0.1	3953			P2	20	0.2	2815
PCB2	P1	9668	96.7	155		NAC+PCB2	P1	9470	94.7	180
	P2	13	0.1	3318			P2	15	0.2	2825
PCB3	P1	9748	97.5	151		NAC+PCB3	P1	9370	93.7	157
	P2	10	0.1	3367			P2	8	0.1	2824
