# Supplementary material for: N-acetylcysteine alleviates PCB52-induced hepatotoxicity by repressing oxidative stress and inflammatory responses
Source: PeerJ. 2020 Aug 11;8:e9720. doi: 10.7717/peerj.9720 (PMC7427542; doi:10.7717/peerj.9720)
Supplement: Supplemental Information 6 [file peerj-08-9720-s006.xlsx]

## Sheet: BRL3A
		MDA content
		control	PCB52
		0.124469	0.309047
		0.189576	0.27152
		0.270002	0.31567
		0.227874	0.33333
		0.202981	0.307392

## Sheet: BRL3A-NAC
MDA content
control	PCB	NAC+PCB	NAC
0.337332	0.601584	0.414798	0.369065
0.288678	0.432916	0.414798	0.27986
0.298409	0.51725	0.438576	0.258871
0.385986	0.441349	0.343464	0.306097
0.327601	0.498275	0.402909	0.303473

## Sheet: L02
MDA content	control	PCB
	0.118041	0.169168
	0.161825	0.17367
	0.155908	0.193175
	0.171292	0.193175
average	0.151766	0.182297
P		0.0180064

## Sheet: L02-NAC
	MDA content
	control	PCB	NAC	NAC+PCB
	0.193019	0.27986	0.189078	0.233933
	0.194324	0.295091	0.191741	0.235641
	0.193019	0.293187	0.18242	0.223688
	0.193454	0.289379	0.187747	0.231087
