# Supplementary material for: N-acetylcysteine alleviates PCB52-induced hepatotoxicity by repressing oxidative stress and inflammatory responses
Source: PeerJ. 2020 Aug 11;8:e9720. doi: 10.7717/peerj.9720 (PMC7427542; doi:10.7717/peerj.9720)
Supplement: Supplemental Information 7 [file peerj-08-9720-s007.xlsx]

## Sheet: PCB52
BRL3A
	C1	C2	C3	AVERAGE		PCB1	PCB2	PCB3	AVERAGE		standardization				AVERAGE					AVERAGE		T.TEST
Traf6	0.00356965	0.00283979	0.00335377	0.00325441		0.00398833	0.00533609	0.00497875	0.00476773			1.09687	0.872599	1.03053	1		1.22552	1.63965	1.52985	1.46501		0.0297286
MyD88	0.00583925	0.00579892	0.00575886	0.00579901		0.00723897	0.00866851	0.00770494	0.00787081			1.00694	0.999984	0.993077	1		1.24831	1.49483	1.32866	1.35727		0.00796041
TNF	1.56002e-06	1.142e-06	1.06553e-06	1.25585e-06		4.23267e-06	4.86206e-06	3.71038e-06	4.26837e-06			1.2422	0.909346	0.84845	1		3.37036	3.87152	2.95447	3.39879		0.00119656
Keap1	0.00312918	0.00421574	0.0030861	0.003477		0.00296038	0.00359448	0.00382586	0.00346024			0.899964	1.21246	0.887574	1		0.851418	1.03379	1.10033	0.995179		0.972141
Nfe2l2	0.075363	0.0698304	0.0544094	0.0665343		0.0698304	0.0836205	0.0902456	0.0812322			1.13269	1.04954	0.817765	1		1.04954	1.2568	1.35638	1.22091		0.165909
Hmox1	0.00929068	0.00775854	0.00680118	0.00795013		0.0160643	0.0236831	0.0203335	0.0200269			1.16862	0.9759	0.85548	1		2.02063	2.97895	2.55763	2.51907		0.00649992
Nqo1	0.00298098	0.00230663	0.0041577	0.00314843		0.01418	0.0093553	0.00825795	0.0105977			0.946812	0.732627	1.32056	1		4.50382	2.97142	2.62288	3.36604		0.0171667
Sqstm1	0.00775854	0.00872881	0.00564035	0.0073759		0.0147822	0.0204749	0.0162885	0.0171819			1.05188	1.18342	0.7647	1		2.00412	2.77592	2.20835	2.32946		0.00709936
L02
	C1	C2	C3	AVERAGE		PCB1	PCB2	PCB3	AVERAGE		standardization				AVERAGE					AVERAGE		T.TEST
TRAF6	0.00252413	0.00300171	0.00374713	0.00309099		0.0043644	0.00306478	0.00372124	0.00371681			0.816609	0.971117	1.21227	1		1.41198	0.991522	1.2039	1.20247		0.292807
MYD88	0.00151129	0.00101803	0.00179724	0.00144219		0.00206449	0.00203607	0.00247218	0.00219091			1.04792	0.705894	1.24619	1		1.4315	1.41179	1.71419	1.51916		0.0489414
TNF	3.97669e-06	1.31918e-05	7.62939e-06	8.26596e-06		1.48415e-05	2.23402e-05	2.4788e-05	2.06566e-05			0.481093	1.59592	0.92299	1		1.7955	2.70267	2.9988	2.49899		0.0367499
IL1B	0.000787736	0.000838	0.000776891	0.000800876		0.00232267	0.00259509	0.00216713	0.00236163			0.983593	1.04635	0.970052	1		2.90016	3.24031	2.70595	2.94881		0.000247788
KEAP1	1.55794e-05	5.17503e-06	1.85271e-05	1.30939e-05		3.38614e-05	5.66301e-06	2.08441e-05	2.01228e-05			1.18983	0.395226	1.41495	1		2.58605	0.432493	1.5919	1.53681		0.482932
NFE2L2	0.0147822	0.020193	0.0195052	0.0181601		0.034674	0.0225614	0.0177013	0.0249789			0.81399	1.11194	1.07407	1		1.90935	1.24236	0.974736	1.37548		0.269597
HMOX1	0.00300171	0.00289946	0.00317286	0.00302468		0.003545	0.00344806	0.00361948	0.00353751			0.992407	0.958602	1.04899	1		1.17202	1.13998	1.19665	1.16955		0.00547211
NQO1	0.00178483	0.00142977	0.00164238	0.00161899		0.00274306	0.0017725	0.00196671	0.00216075			1.10243	0.883125	1.01444	1		1.6943	1.09482	1.21477	1.33463		0.159477

## Sheet: (Brl-3A)NAC-PCB52
Brl-3A
Gene	data											AVERAGE		standardization					AVERAGE
Traf6	20190320	Control	PCB	NAC	NAC+PCB		Traf6	Control	0.00275902	0.00340687	0.00347276	0.00321288		Traf6	Control	0.858735	1.06038	1.08089	1
		0.00275902	0.00554265	0.00270693	0.00299006			PCB	0.00554265	0.00532423	0.0046254	0.00516409			PCB	1.72513	1.65715	1.43964	1.60731
		0.00340687	0.00532423	0.00330675	0.0037459			NAC	0.00270693	0.00330675	0.00349317	0.00316895			NAC	0.842524	1.02922	1.08724	0.986326
		0.00347276	0.0046254	0.00349317	0.0044445			NAC+PCB	0.00299006	0.0037459	0.0044445	0.00372682			NAC+PCB	0.930647	1.1659	1.38334	1.15996
MyD88	20190320	Control	PCB	NAC	NAC+PCB		MyD88	Control	0.0101227	0.0111965	0.01166	0.0109931		MyD88	Control	0.920827	1.01851	1.06067	1
		0.0101227	0.0175945	0.00936439	0.0139099			PCB	0.0175945	0.0178243	0.0160158	0.0171449			PCB	1.6005	1.62141	1.4569	1.5596
		0.0111965	0.0178243	0.0127756	0.0126898			NAC	0.00936439	0.0127756	0.0136385	0.0119262			NAC	0.851843	1.16215	1.24064	1.08488
		0.01166	0.0160158	0.0136385	0.0116606			NAC+PCB	0.0139099	0.0126898	0.0116606	0.0127534			NAC+PCB	1.26533	1.15435	1.06072	1.16013
HO-1	20190312	Control	PCB	NAC	NAC+PCB		HO-1	Control	0.00521114	0.00845281	0.0105465	0.00807014		HO-1	Control	0.645731	1.04742	1.30685	1
		0.00521114	0.0331981	0.00632015	0.0245627			PCB	0.0331981	0.0291431	0.0321431	0.0314948			PCB	4.1137	3.61123	3.98297	3.90263
		0.00845281	0.0291431	0.00763987	0.0270387			NAC	0.00632015	0.00763987	0.00710952	0.00702318			NAC	0.783152	0.946684	0.880966	0.870268
		0.0105465	0.0321431	0.00710952	0.0244879			NAC+PCB	0.0245627	0.0270387	0.0244879	0.0253631			NAC+PCB	3.04366	3.35046	3.03439	3.14283
TNF	20190320	Control	PCB	NAC	NAC+PCB		TNF	Control	1.67644e-05	6.58517e-06	4.96596e-05	2.43364e-05		TNF	Control	0.688862	0.270589	2.04055	1
		1.67644e-05	0.000160819	3.68305e-05	0.000133735			PCB	0.000160819	0.000195533	0.000159697	0.000172017			PCB	6.60818	8.0346	6.56209	7.06829
		6.58517e-06	0.000195533	4.15771e-05	0.000113577			NAC	3.68305e-05	4.15771e-05	4.45959e-05	4.10012e-05			NAC	1.51339	1.70844	1.83248	1.68477
		4.96596e-05	0.000159697	4.45959e-05	0.000110468			NAC+PCB	0.000133735	0.000113577	0.000110468	0.00011926			NAC+PCB	5.49528	4.66694	4.53922	4.90048
NQO1	20190312	Control	PCB	NAC	NAC+PCB		NQO1	Control	0.0128355	0.0218526	0.0183119	0.0176667		NQO1	Control	0.72654	1.23694	1.03652	1
		0.0128355	0.0395084	0.0187552	0.0406687			PCB	0.0395084	0.034732	0.0387761	0.0376722			PCB	2.23633	1.96596	2.19487	2.13239
		0.0218526	0.034732	0.0274794	0.0468072			NAC	0.0187552	0.0274794	0.0163009	0.0208452			NAC	1.06162	1.55544	0.922693	1.17992
		0.0183119	0.0387761	0.0163009	0.0355199			NAC+PCB	0.0406687	0.0468072	0.0355199	0.0409986			NAC+PCB	2.302	2.64947	2.01056	2.32068
P62	20190315	Control	PCB	NAC	NAC+PCB		P62	Control	0.00432746	0.006646	0.00775909	0.00624418		P62	Control	0.693038	1.06435	1.24261	1
		0.00432746	0.0145329	0.00251693	0.0135472			PCB	0.0145329	0.0145496	0.0153014	0.0147946			PCB	2.32743	2.33011	2.45051	2.36935
		0.006646	0.0145496	0.00620498	0.0179169			NAC	0.00251693	0.00620498	0.00805403	0.00559198			NAC	0.403085	0.993722	1.28984	0.89555
		0.00775909	0.0153014	0.00805403	0.0141812			NAC+PCB	0.0135472	0.0179169	0.0141812	0.0152151			NAC+PCB	2.16957	2.86938	2.2711	2.43669
Nrf2	20190320	Control	PCB	NAC	NAC+PCB		Nrf2	Control	0.0681242	0.0948285	0.0746925	0.0792151		Nrf2	Control	0.85999	1.1971	0.942907	1
		0.0681242	0.094403	0.0720088	0.086471			PCB	0.094403	0.115756	0.089634	0.099931			PCB	1.19173	1.46129	1.13153	1.26151
		0.0948285	0.115756	0.0884747	0.118684			NAC	0.0720088	0.0884747	0.0672087	0.0758974			NAC	0.909029	1.11689	0.848433	0.958118
		0.0746925	0.089634	0.0672087	0.0843916			NAC+PCB	0.086471	0.118684	0.0843916	0.0965156			NAC+PCB	1.0916	1.49825	1.06535	1.2184
keap1	20190312	Control	PCB	NAC	NAC+PCB		keap1	Control	0.00295025	0.00457755	0.00350708	0.00367829		keap1	Control	0.802071	1.24448	0.953452	1
		0.00295025	0.00486435	0.00289688	0.00364516			PCB	0.00486435	0.00367828	0.00396241	0.00416834			PCB	1.32245	0.999996	1.07724	1.13323
		0.00457755	0.00367828	0.00510341	0.00458569			NAC	0.00289688	0.00510341	0.00327341	0.0037579			NAC	0.787561	1.38744	0.889926	1.02164
		0.00350708	0.00396241	0.00327341	0.00433659			NAC+PCB	0.00364516	0.00458569	0.00433659	0.00418915			NAC+PCB	0.990992	1.24669	1.17897	1.13888

## Sheet: (L-02)NAC-PCB52
L-02
Gene	data											AVERAGE		standardization					AVERAGE
MyD88	20190830	Control	PCB	NAC	NAC+PCB		MyD88	Control	0.00306478	0.00302259	0.00283979	0.00297572		MyD88	Control	1.02993	1.01575	0.95432	1
		0.00306478	0.00579892	0.00300171	0.0033771			PCB	0.00579892	0.00612956	0.00666121	0.00619656			PCB	1.94875	2.05986	2.23852	2.08237
		0.00302259	0.00612956	0.00323953	0.00356965			NAC	0.00300171	0.00323953	0.00278135	0.00300753			NAC	1.00873	1.08865	0.934681	1.01069
		0.00283979	0.00666121	0.00278135	0.00387927			NAC+PCB	0.0033771	0.00356965	0.00387927	0.00360867			NAC+PCB	1.13488	1.19959	1.30364	1.21271
TRAF6	20190528	Control	PCB	NAC	NAC+PCB		Traf6	Control	0.00248938	0.00278135	0.00264962	0.00264011		TRAF6	Control	0.942905	1.0535	1.0036	1
		0.00248938	0.00268661	0.00206449	0.00252413			PCB	0.00268661	0.00291963	0.00302259	0.00287627			PCB	1.01761	1.10587	1.14487	1.08945
		0.00278135	0.00291963	0.00263132	0.00289946			NAC	0.00206449	0.00263132	0.00118574	0.00196051			NAC	0.781969	0.996667	0.449123	0.742587
		0.00264962	0.00302259	0.00118574	0.00326206			NAC+PCB	0.00252413	0.00289946	0.00326206	0.00289522			NAC+PCB	0.956067	1.09823	1.23558	1.09663
HMOX1	20191005	Control	PCB	NAC	NAC+PCB		HO-1	Control	0.00390625	0.00487629	0.00583925	0.00487393		HO-1	Control	0.801458	1.00048	1.19806	1
		0.00390625	0.00728932	0.00508337	0.00837323			PCB	0.00728932	0.00519018	0.00634572	0.00627507			PCB	1.49557	1.06489	1.30197	1.28748
		0.00487629	0.00519018	0.00575886	0.00786684			NAC	0.00508337	0.00575886	0.00587987	0.00557403			NAC	1.04297	1.18156	1.20639	1.14364
		0.00583925	0.00634572	0.00587987	0.00515433			NAC+PCB	0.00837323	0.00786684	0.00515433	0.00713147			NAC+PCB	1.71796	1.61406	1.05753	1.46319
TNF	20191005	Control	PCB	NAC	NAC+PCB		TNF	Control	2.77323e-06	4.00435e-06	8.3488e-06	5.04213e-06		TNF	Control	0.550012	0.794179	1.65581	1
		2.77323e-06	1.14048e-05	2.6974e-06	9.39289e-06			PCB	1.14048e-05	1.38476e-05	1.33759e-05	1.28761e-05			PCB	2.2619	2.74639	2.65284	2.55371
		4.00435e-06	1.38476e-05	8.52422e-06	5.82222e-06			NAC	2.6974e-06	8.52422e-06	6.8285e-06	6.01671e-06			NAC	0.534972	1.6906	1.35429	1.19329
		8.3488e-06	1.33759e-05	6.8285e-06	5.21103e-06			NAC+PCB	9.39289e-06	5.82222e-06	5.21103e-06	6.80871e-06			NAC+PCB	1.86288	1.15471	1.0335	1.35036
NQO1	20190601	Control	PCB	NAC	NAC+PCB		NQO1	Control	0.00102511	0.00130657	0.00148019	0.00127063		NQO1	Control	0.806779	1.02829	1.16493	1
		0.00102511	0.00182233	0.00121065	0.00151129			PCB	0.00182233	0.00127084	0.00188659	0.00165992			PCB	1.4342	1.00017	1.48478	1.30638
		0.00130657	0.00127084	0.00179724	0.00158643			NAC	0.00121065	0.00179724	0.00115331	0.00138707			NAC	0.9528	1.41445	0.907674	1.09164
		0.00148019	0.00188659	0.00115331	0.0014199			NAC+PCB	0.00151129	0.00158643	0.0014199	0.00150587			NAC+PCB	1.18941	1.24854	1.11748	1.18514
NFE2L2	20190601	Control	PCB	NAC	NAC+PCB		Nrf2	Control	0.00922651	0.0122591	0.0128686	0.0114514		Nrf2	Control	0.805709	1.07053	1.12376	1
		0.00922651	0.0155171	0.0114382	0.013139			PCB	0.0155171	0.0135084	0.0189718	0.0159991			PCB	1.35504	1.17963	1.65672	1.39713
		0.0122591	0.0135084	0.014082	0.0103087			NAC	0.0114382	0.014082	0.0115978	0.0123727			NAC	0.998843	1.22972	1.01279	1.08045
		0.0128686	0.0189718	0.0115978	0.00942037			NAC+PCB	0.013139	0.0103087	0.00942037	0.010956			NAC+PCB	1.14737	0.900208	0.822638	0.956739
KEAP1	20190601	Control	PCB	NAC	NAC+PCB		keap1	Control	1.12478e-05	2.46168e-05	2.46168e-05	2.01604e-05		keap1	Control	0.557914	1.22104	1.22104	1
		1.12478e-05	2.9478e-05	5.3948e-06	2.18804e-05			PCB	2.9478e-05	2.63836e-05	1.61288e-05	2.39968e-05			PCB	1.46217	1.30868	0.800023	1.19029
		2.46168e-05	2.63836e-05	1.38476e-05	1.31918e-05			NAC	5.3948e-06	1.38476e-05	1.77724e-05	1.23383e-05			NAC	0.267593	0.686872	0.88155	0.612005
		2.46168e-05	1.61288e-05	1.77724e-05	1.76497e-05			NAC+PCB	2.18804e-05	1.31918e-05	1.76497e-05	1.7574e-05			NAC+PCB	1.08532	0.654341	0.875461	0.871706
IL1B	20190601	Control	PCB	NAC	NAC+PCB		il1b	Control	0.000478233	0.000631032	0.000644291	0.000584518		IL1B	Control	0.818165	1.07958	1.10226	1
		0.000478233	0.000850147	0.000618045	0.000709948			PCB	0.000850147	0.000766195	0.000911165	0.000842502			PCB	1.45444	1.31081	1.55883	1.44136
		0.000631032	0.000766195	0.000584706	0.000714886			NAC	0.000618045	0.000584706	0.000592869	0.00059854			NAC	1.05736	1.00032	1.01429	1.02399
		0.000644291	0.000911165	0.000592869	0.000700173			NAC+PCB	0.000709948	0.000714886	0.000700173	0.000708336			NAC+PCB	1.21459	1.22303	1.19786	1.21183
